# Supplementary material for: TMEM147 aggravates the progression of HCC by modulating cholesterol homeostasis, suppressing ferroptosis, and promoting the M2 polarization of tumor-associated macrophages
Source: PubMed Central journal article supplement (PMC10612308; doi:10.1186/s13046-023-02865-0), 2023-10-28

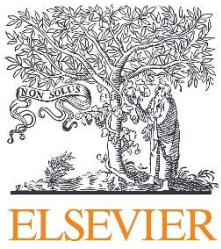

# Certificate of Elsevier Language Editing Services

**The following article was edited by Elsevier Language Editing Services:**

**TMEM147 aggravates the progression of HCC by modulating  
cholesterol homeostasis, suppressing ferroptosis and promoting M2 polarization  
of TAMs**

**Ordered by:**

**Jingjing Huang**

**Estimated Delivery date:**

**2023-09-28**

**Order reference:**

**ASLEPLUS0457927**

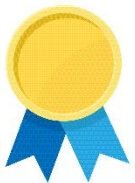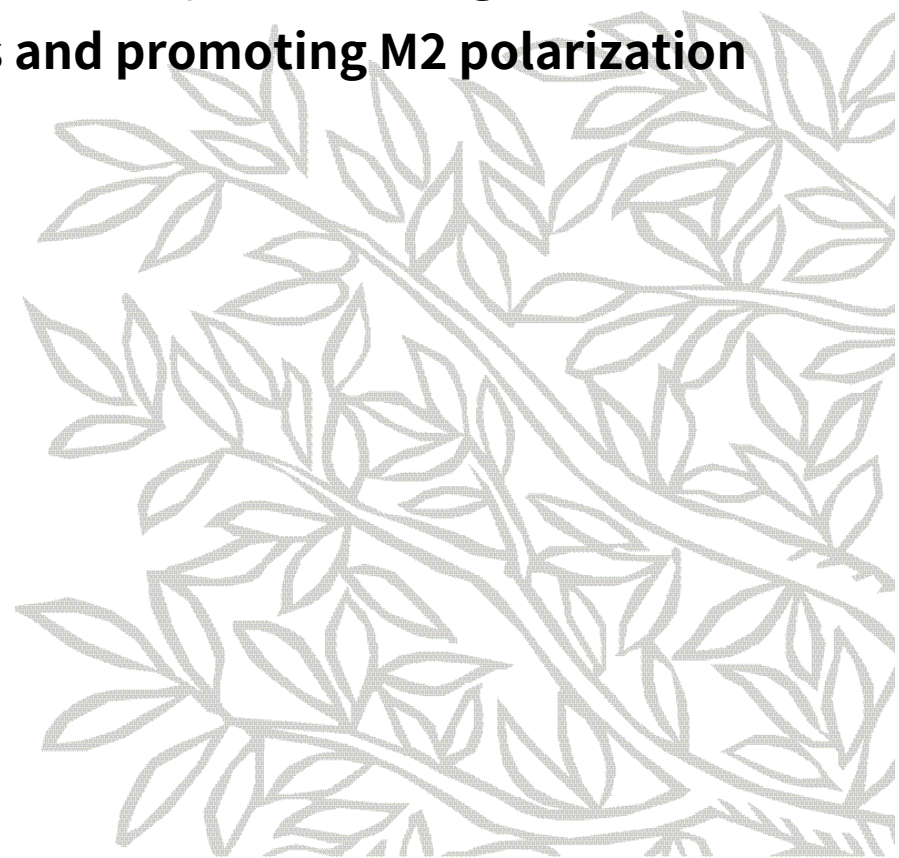

Supplement: 13046_2023_2865_MOESM1_ESM.pdf [file 13046_2023_2865_MOESM1_ESM.pdf]
